# The Murine Testicular Transcriptome: Characterizing Gene Expression in the Testis During the Progression of Spermatogenesis<sup>1</sup>

James E. Shima,<sup>3</sup> Derek J. McLean,<sup>4</sup> John R. McCarrey,<sup>5</sup> and Michael D. Griswold<sup>2,3</sup>

Center for Reproductive Biology,<sup>3</sup> School of Molecular Biosciences, Washington State University, Pullman, Washington 99164

Department of Animal Sciences,<sup>4</sup> Washington State University, Pullman, Washington 99164

Department of Biology,<sup>5</sup> University of Texas, San Antonio, Texas 78249

## ABSTRACT

One of the most promising applications of microarrays is the study of changes in gene expression associated with the growth and development of mammalian tissues. The testis provides an excellent model to determine the ability of microarrays to effectively characterize the changes in gene expression as an organ develops from birth to adulthood. To this end, a developmental testis gene expression time course profiling the expression patterns of ~36 000 transcripts on the Affymetrix MGU74v2 GeneChip platform at 11 distinct time points was created to gain a greater understanding of the molecular changes necessary for and elicited by the development of the testis. Additionally, gene expression profiles of isolated testicular cell types were created that can aid in the further characterization of the specific functional actions of each cell type in the testis. Statistical analysis of the data revealed 11 252 transcripts (9846 unique) expressed differentially in a significant manner. Subsequent cluster analysis produced five distinct expression patterns within the time course. These patterns of expression are present at distinct chronological periods during testis development and often share similarities with cell-specific expression profiles. Analysis of cell-specific expression patterns produced unique and characteristic groups of transcripts that provide greater insight into the activities, biological and chronological, of testicular cell types during the progression of spermatogenesis. Further analysis of this time course can provide a distinct and more definitive view into the genes implicated, known and unknown, in the maturation, maintenance, and function of the testis and the integrated process of spermatogenesis.

*developmental biology, gene regulation, spermatogenesis, testis*

## INTRODUCTION

The testes are part of a select set of organs necessary for the continued propagation of a species that reproduces sexually. Specifically, testes are the site of spermatogenesis, a complex process in which the somatic Sertoli cells of the seminiferous epithelium support the differentiation of germ cells into functionally competent spermatozoa. The production of spermatozoa requires precise and highly ordered gene expression in order to initiate and maintain the nu-

merous cellular processes leading to mature spermatozoa, including various mitotic, meiotic, and differentiation events [1]. Gene expression in the testis can be regulated by a variety of factors, including hormones, cell-cell interactions, and environmental cues, each of which can occur simultaneously or at distinct periods during the maturation of the animal leading to sexual maturity. Identification of the genes involved in the production of sperm via spermatogenesis has shown that both unique and ubiquitous genes play key roles in this process [1]. However, identifying and characterizing the genes necessary for spermatogenesis and their expression patterns at the genomic level has proven difficult due to the complex nature of an organ consisting of numerous cell types, each contributing to the total testicular transcriptome.

Once the first wave of spermatogenesis has been completed, spermatozoa are produced asynchronously throughout postpubertal life, making identification of genes involved in specific actions or from specific cell types within the testis difficult to pinpoint [2]. However, during the prepubertal period of development and continuing through the first wave of spermatogenesis, germ cells multiply and differentiate in a synchronous fashion in the testes [3]. Therefore, the analysis of changes in gene expression based on major stages of development, especially in regard to germ cell development, will provide a powerful tool to determine the cellular processes involved in the formation of spermatozoa.

Microarrays provide a platform to evaluate the abundance of thousands of genes using a single biological sample [4–6]. The application of microarrays to investigate gene expression in a single cell suspension *in vitro* over a time course following hormone treatment demonstrated the applicability of this technique to the analysis of hormonal regulation of gene expression [7]. Microarray studies have also been undertaken to determine the expression of testis or germline related genes in invertebrate animals such as *Drosophila melanogaster* [8] and *Caenorhabditis elegans* [9]. The analysis of gene expression using microarrays during organ development in vertebrates has additional challenges due to the changes in cell populations, the timing of cell differentiation, the variation of gene expression due to changing cell activity, and the general increase in complexity of cellular activities in higher eukaryotes. This is particularly true in the mammalian testis, in which the somatic cells and the differentiating germ cells undergo dramatic changes in transcription and differentiation. The complexity of the differentiating testis provides an interesting model to determine if microarray analysis of gene expression is adequate to decipher the changes occurring in the transcriptome. Furthermore, the timing of the appearance, prolifer-

<sup>1</sup>Supported by HD 10808 and U54 HD42454 from NICHD awarded to M.D.G. and ES09136 from NIEHS awarded to J.R.M.

<sup>2</sup>Correspondence: Michael D. Griswold, 531 Fulmer Hall, School of Molecular Biosciences, Washington State University, Pullman, WA 99164-4660. FAX: 509 335 9688; e-mail: griswold@mail.wsu.edu

Received: 21 January 2004.

First decision: 5 February 2004.

Accepted: 8 March 2004.

© 2004 by the Society for the Study of Reproduction, Inc.

ISSN: 0006-3363. <http://www.biolreprod.org>

ation, and differentiation of individual cell types in the testis and many of the genes associated with these cell types has been firmly established in the mouse, thus providing a powerful means to determine if microarray data recapitulate prior knowledge of the system. Application of this knowledge has many implications in fertility treatments and new contraceptive options.

The mouse testis developmental testis time course was designed to resolve the expression profile of approximately 36 000 transcripts throughout the development, taking into consideration the simultaneous progression of spermatogenesis. The ultimate goal of this time course was characterizing the expression profiles of the testis as a whole and that of the individual cell types that comprise it. Analysis of the time course confirmed that microarray data recapitulates known gene expression patterns in the testes at the organ and cellular level. Furthermore, the genes involved in numerous steps of spermatogenesis, their relative abundance, and the number of genes with changing expression patterns during major stages of development were also determined. Cell-specific gene expression was also established using enriched testicular cell populations of Sertoli, myoid, and germ cells, including type A and B spermatogonia, pachytene spermatocytes, and round spermatids. These expression profiles further emphasize the known functional activities of each cell type and present new possibilities for other functional processes and the involvement of previously unknown genes in the maturation of the testis and differentiation of germ cells.

Although not conclusive by nature, characterization of the testis transcriptome in this fashion effectively describes the major changes during testis development and the major transcripts present in each cell type in the testis and provides a useful resource for future studies of the biological factors influencing testis development and spermatogenesis.

## MATERIALS AND METHODS

### RNA Preparation

Protocols for the use of animals in this experiment were approved by the Washington State University and University of Texas at San Antonio Animal Care and Use Committees and were in accordance with the National Institute of Health's standards established by the Guidelines for the Care and Use of Experimental Animals. A BL/6-129 mouse colony was maintained in a temperature- and humidity-controlled room with food and water provided ad libitum. Whole testes were obtained from neonates at Days 0, 3, 6, 8, 10, 14, 18, 20, 30, 35, and 56 postpartum. Replicate samples were obtained in a similar fashion from the same breeding pairs.

Mouse Sertoli and peritubular myoid cells were obtained from 16- to 18-day-old whole testes from BL/6-129 mice using a primary culture system and were cultured for a minimum of 2 days at 37°C with 5% CO<sub>2</sub> using standard culture procedures in Dulbecco modified Eagle medium and Ham F12 media following the method described by Karl and Griswold [10]. Enriched germ cell isolates were obtained from CD1 mice from the McCarrey lab at the University of Texas, San Antonio, via gravity sedimentation [11]. These samples included type A and B spermatogonia, pachytene spermatocytes, and round spermatids from animals 8, 30, and 60 days of age, respectively. The purity of all the isolated and cultured cells was determined via morphological criteria. The purity of type A and B spermatogonia was >85% and the purity of all other testicular cell types was >95%.

Additionally, adult mouse brain and liver samples and whole testis samples from W/W<sup>v</sup> mice were obtained and used in the analysis. Brain and liver samples were used in the subtraction process in order to eliminate high-abundance transcripts that tended to be ubiquitous throughout mouse tissues. The W/W<sup>v</sup> testis sample, which, due to a mutation in the kit receptor (*c-kit*) has a negligible number of germ cells, provided a closer *in vivo* model to the whole testis and was used to isolate specific germ cell expression profiles rather than subtracting each individual somatic cell type. The W/W<sup>v</sup> sample was also used to indirectly determine the expression profile of Leydig cells.

All of the excised testicular and tissue samples were immediately placed in TRIzol reagent (Invitrogen, Carlsbad, CA) and stored at -70°C until total RNA was extracted according to the manufacturer's standard protocol. RNA from the isolated testicular cell types was extracted using the same protocols from the manufacturer. RNA quality was determined by both electrophoretic methods using a denaturing agarose gel and absorption readings at 260 and 280 nm. If excessive degradation or protein contamination of the RNA was evident, the sample was not used for microarray hybridization. A minimum optical density (OD<sub>260/280</sub>) ratio of 1.8 was required for microarray hybridization.

### Microarray Processing

Ten micrograms of total RNA from each of the testicular and tissue samples was used to create the target for the microarray. Using the terminology of this microarray system, target refers to biotinylated complementary RNA (cRNA) created from the total RNA while probe refers to the oligonucleotides synthesized on the microarray platform. The biotinylated cRNA was generated using an oligo(dT) primer with a T7 promoter in a reverse transcription reaction, followed by *in vitro* transcription using the MEGAScript kit (Ambion, Austin, TX) with biotinylated cytosine and uridine triphosphate. The labeled cRNA was fragmented, hybridized to MGU74Av2, Bv2, and Cv2 arrays (Affymetrix, Santa Clara, CA), and stained in accordance with the manufacturer's standard protocol. The same procedure was performed on duplicate samples with the exception of liver, brain, W/W<sup>v</sup> testis, and germ cell samples, which had only one sample. The arrays were stained and washed utilizing the Affymetrix GeneChip Fluidics Station 400 and scanned using a GeneArray Scanner 2500A (Agilent, Palo Alto, CA). The resulting data were viewed and preliminary assessment was made using Microarray Suite 5.0 (MAS) software (Affymetrix). All reactions and microarray hybridization procedures were performed in the Laboratory for Biotechnology and Bioanalysis I (LBBI) at Washington State University.

### Absolute and Statistical Analysis

Microarray output was examined visually for excessive background noise and physical anomalies. The default MAS statistical values were used for all analyses. All probe sets on each array were scaled to a mean target signal intensity of 125, with the signal correlating to the amount of transcript in the sample. An absolute analysis using MAS was performed to assess the relative abundance of the ~36 000 represented transcripts based on signal and detection (present, absent, or marginal). Although ~36 000 probe sets are represented on these arrays, there is a certain level of redundancy within and between each array, which results in a lower number of unique transcripts represented on the MGU74v2 chipset; however, the level of redundancy has not been firmly established.

The absolute analysis from MAS was imported into GeneSpring 5.1 software (Silicon Genetics, Redwood City, CA). The developmental time course data was normalized within GeneSpring using the default/recommended normalization methods. These include setting of signal values below 0.01 to 0.01, total chip normalization to the 50th percentile, and normalization of each gene to the median. Isolated cell types, liver, brain, and W/W<sup>v</sup> testis samples, were normalized in the same manner but without normalizing each gene to the median. These normalizations allowed for the visualization of data based on relative abundance at any given time point rather than compared to a specific control value.

Data restrictions and analytical tools in GeneSpring were applied to isolate noteworthy and possibly important patterns of gene expression during the course of testicular development and spermatogenesis. Transcripts expressed differentially at a statistically significant level were determined using a one-way ANOVA parametric test with variances not assumed equal, a *P*-value cutoff of 0.05 and using a Benjamini and Hochberg False discovery rate multiple testing correction. This was applied to all 11 time points and considered all transcripts represented on the arrays. Subsequently, expression restrictions were applied to the transcripts expressed in a significant manner. These restrictions were designed so that the remaining transcripts met the following requirements in addition to being expressed in a significant manner: 1) each transcript must have a signal value of at least 100 in a minimum of 2 out of 11 points in the time course and 2) the range of the replicates must not exceed 1 (in the normalized scale) in half of the time points comprising the time course. The resulting transcripts were screened using Excel (Microsoft, Redmond, WA) for redundant UniGene entries. Transcripts that passed these restrictions were considered for further analysis.

### Cluster Analysis

Patterns of gene expression were identified using unsupervised cluster analysis within the set of differentially expressed transcripts that met the requirements detailed previously. Clustering algorithms allow for the separation of distinct patterns of expression based on the similarity of expression profiles between different genes [12]. In this analysis, a hierarchical clustering algorithm utilizing a smooth correlation with the default parameters was utilized in order to isolate distinct, nonrepetitive patterns of expression within the time course. A nonphylogenetic gene tree was produced from this analysis that illustrates the major expressional patterns within the differentially expressed transcripts (determined through statistical analysis) in a continuous fashion.

### In Silico Subtraction

Using a method based on in silico subtraction techniques, two categories describing the localization of transcripts within the testis can be made: 1) transcripts can either be expressed at a high level compared with other cell types in the testis (enriched) or 2) transcripts can be expressed uniquely in a particular cell type compared with other cell types in the testis (specific). These characterizations were made within GeneSpring based on the raw data associated with each transcript from each tissue and cell experiment of interest. Enriched transcripts were required to have a signal level of at least 200 and be at least 2-fold higher in the cell type of interest than in any other cell or tissue sample. Specific transcripts had to meet the enriched specifications and have signal levels below 100 in all other cell and tissue types. As an example, each transcript determined to be enriched in Sertoli cells had to have a signal level of at least 200 in the Sertoli cell microarray experiment and that signal level had to also be 2-fold higher than in every other experimental dataset including all four germ cell types, myoid cells, and brain and liver tissue. Transcripts considered Sertoli cell specific were required to have a signal level below 100 in all other cell and tissue types as well as meet the enriched transcript requirements. Expression profiles were identified for Sertoli, Leydig, myoid, type A and B spermatogonia, pachytene spermatocytes, and round spermatids using these parameters. W/W<sup>v</sup> testis samples were used in the subtractions for all germ cell types and for indirect Leydig cell-enriched and -specific transcript identification. Results were plotted using the associated data from the testis developmental gene expression time course to relate what transcripts enriched for a particular cell type were doing during the course of testicular development and spermatogenesis.

## RESULTS

### Global Analysis

A genome-wide transcriptional analysis of the developing murine testis and spermatogenesis was done using the Affymetrix GeneChip system. Approximately 36 000 transcripts, representing the entire murine genome (based on build 74 of the UniGene database) were monitored from birth (Day 0) through adulthood (Day 54). In all, 66 arrays (two independent replicates per time point using the MGU74v2 A, B, and C chips) were used to construct the 11 time point testis developmental expression time course. The time points were chosen based on the previous work of numerous laboratories that determined the time frame for the appearance of specific types of germ cells as summarized by McCarrey [2]. The complete dataset from the time course is accessible through NCBI via the Gene Expression Omnibus repository (GEO; <http://www.ncbi.nih.gov/geo/>), GEO accession number GSE926. The data is also in a searchable form via the Mammalian Reproductive Genetics database (<http://mrg.genetics.washington.edu>).

The average percentage of transcripts on the A, B, and C chips that were expressed in the testis (called present) was determined to be 45.5 (5460 transcripts), 36.1 (4332 transcripts), and 18.7 (2244 transcripts), respectively, based on analysis within MAS. There was a global trend in the number of unique transcripts called present in the testis at any given point in the time course, as shown in Table 1. Specifically, the number of unique transcripts expressed in

TABLE 1. Transcripts expressed at various stages during the first wave of spermatogenesis.

| Day postpartum | Percentage present | Number present |
|----------------|--------------------|----------------|
| 0              | 34.3               | 12 723         |
| 3              | 33.4               | 12 397         |
| 6              | 33.6               | 12 447         |
| 8              | 33.5               | 12 408         |
| 10             | 36.1               | 13 395         |
| 14             | 37.3               | 13 812         |
| 18             | 34.5               | 12 787         |
| 20             | 31.8               | 11 772         |
| 30             | 32.5               | 12 043         |
| 35             | 30.4               | 11 260         |
| 56             | 29.2               | 10 822         |

the testis increased steadily from birth into meiosis (peaking at Day 14 with 13 812 transcripts considered present) followed by a gradual decrease through to adulthood, with only 10 822 transcripts considered present in the adult mouse testis. Approximately 21 000 total transcripts were called present at any one point during testis development in the time course. In contrast, ~15 000 of transcripts represented on the arrays demonstrated a complete absence of expression in the testis throughout the time course (called absent in all 11 time points).

### Statistical Evaluation of Expression

Using the restrictions and statistical tests in GeneSpring as described in the *Materials and Methods*, specifically the one-way ANOVA parametric test and a signal level of at least 100 in two of the time points, a group of 11 252 transcripts was identified for further analysis based on their differential expression within the time course. Screening for redundant UniGene numbers reduced this group to 9846 unique transcripts. These transcripts were chosen independently of the previous methods of global analysis based on absence or presence calls and represented ~27% of the transcripts on the MGU74v2 chipset. When these transcripts were displayed in a parallel-coordinate plot, a pattern of expression was evident wherein a high level of expression of numerous transcripts was evident early in testis development that tapered off to a significantly lower level prior to meiosis and the appearance of pachytene spermatocytes approximately 14 days after birth. This was followed by elevated expression of an altogether unique set of transcripts through to adulthood, as shown in Figure 1. This pattern illustrates the importance of the major periods in testicular development: the initial formation of an environment conducive to spermatogenesis, the entrance into meiosis, and resulting production and proliferation of haploid gametes within the testis.

### Cluster Analysis

Cluster analysis was used to better characterize the more specific and unique patterns of expression of the 9846 unique and statistically significant transcripts. A hierarchical clustering algorithm was utilized within GeneSpring to generate a gene tree representative of the major patterns of expression occurring in this group of transcripts (Fig. 2). Five distinct patterns with relatively discrete chronological boundaries emerged from within the time course. The five unique patterns included high expression from birth to 6–8 days postpartum (Fig. 2A), an elongated period of elevated expression between Day 0 and 14 days postpartum (Fig. 2B), induction at Days 6–8, with repression occurring



FIG. 1. Parallel-coordinate plot of statistically significant transcripts during testis development. Plot created in GeneSpring 5.1 depicting the expression profile of 9846 unique and significantly expressed transcripts during the course of testis development. Colors are representative of expression levels at Day 0 postpartum. X-axis is days postpartum and the y-axis is normalized intensity, which is directly calculated from the signal data. The initial appearance of distinct germ cell types during the first wave of spermatogenesis in the mouse is delineated by the following abbreviations: SpG, Type A spermatogonia; SpC, spermatocytes; SpC-P, pachytene spermatocytes; SpT, spermatids; Sp, spermatozoa.

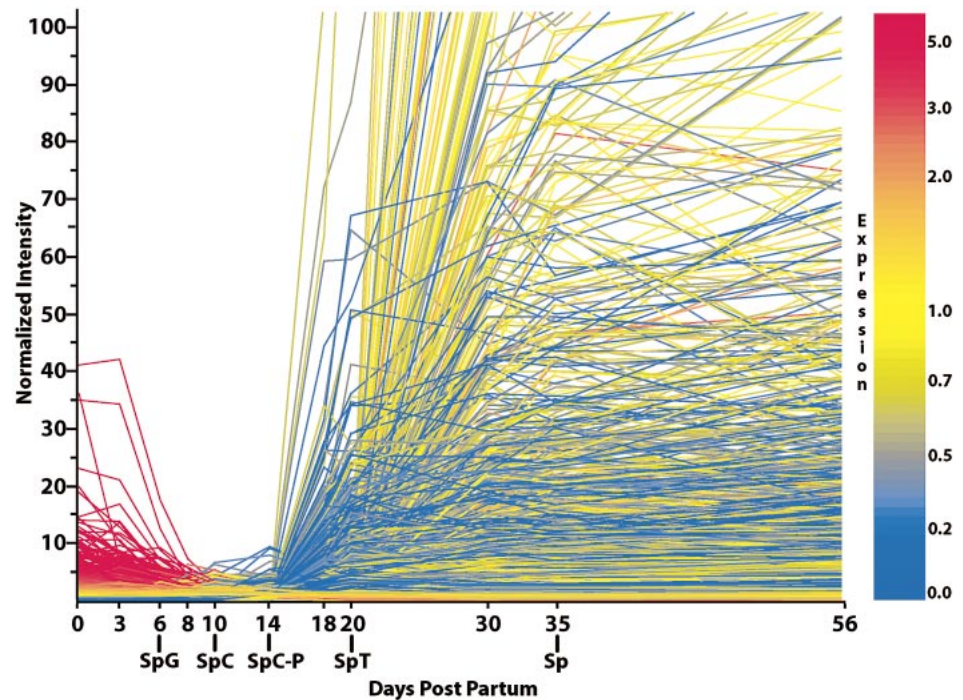

between Days 14 and 18 (Fig. 2C), dramatic upregulation beginning between 14 and 18 days after birth and remaining elevated until adulthood (Fig. 2D), and dramatic upregulation between Days 20 and 30 with sustained elevated levels through to adulthood (Fig. 2E). These specific groups contained 1169, 3322, 1027, 3210, and 1118 transcripts, respectively, with no overlap between the transcripts comprising each group. Although not definitive, the presence of previously identified genes within each of these groups may infer similar roles for the other transcripts present in the same clusters, such as meiosis in cluster C and D and the specialized structure and function of spermatozoa in clusters D and E. A list of genes essential to spermatogenesis, as determined through knockout models, is presented in Table 2. These transcripts are indicative of some of the processes that are occurring at various stages of spermatogenesis and further demonstrate how genes required for complete spermatogenesis exhibit varied expression patterns and levels throughout testis development. Complete lists of transcripts from each cluster will be available as supplemental data through the Griswold Lab homepage (<http://www.wsu.edu/~griswold/microarray>).

#### Testicular Cell-Type Expression Profiling

Gene expression profiles of testicular cell types were obtained through *in silico* subtraction using microarray results from isolated cell type samples. The groups of transcripts defined using this technique can serve as a starting point for further investigation into cell-specific transcripts and their actions within each specific cell type and the testis. The number of transcripts considered enriched and specific in each cell type varied significantly, with round spermatids possessing the greatest number of enriched and specific transcripts while spermatogonia exhibited the smallest number of enriched and specific transcripts. This reinforces previous findings demonstrating that advanced germ cells (specifically spermatocytes and spermatids) possess a large number of genes with unique functions and specific localization to the testis [64]. Somatic cells present in the testes

presented a varied range of enriched and specific transcripts, the numbers of which fall between the levels of spermatogonia and more advanced germ cells. The number of enriched and specific transcripts from each cell type is shown in Table 3. The results of these subtractions yielded groups of transcripts that exhibited unique patterns of expression when plotted in the testis developmental time course (using the data associated with mRNA levels present in a complete testis rather than isolated cell types). Analysis within the context of the developmental time course also allows for the identification of unique expression patterns of individual transcripts during testis development based on testicular cell type. Complete expression profiles of enriched transcripts in each cell type are shown in Figures 3 and 4. These figures represent the general pattern of expression of the major testicular cell types during testis development. As expected, advanced meiotic and postmeiotic germ cells exhibited a high degree of induction of transcripts beginning at 14 days postpartum and 20 days postpartum, respectively, with the vast majority of these transcripts being maintained at an elevated level through to adulthood, as indicated in Figure 3. A limited number of significant changes in expression of these transcripts were detected prior to the appearance of spermatocytes at 10–14 days postpartum and spermatids at about 18 days postpartum. Transcripts enriched in the two types of spermatogonia demonstrated an opposing pattern of expression, with distinct peaks in number and expression level occurring both perinatally and 10–14 days postpartum, although some significant levels of expression did occur during the later stages of spermatogenesis between 14 and 56 days postpartum. Sertoli-, Leydig-, and myoid cell-enriched transcripts exhibited high levels of expression between birth and 6 days postpartum, while Sertoli cell-enriched transcripts also had a distinctive pattern of gene regulation similar to that found in cluster C of Figure 2, in which transcripts were induced approximately 8 days postpartum, reached a peak level of expression by 10–14 days postpartum, and were returned to basal levels by 14–18 days postpartum. Each of the so-

matic cell types also contained enriched transcripts the expression of which did not change or reach a peak level until meiosis or afterward, indicating their possible regulation by the presence of meiotic or postmeiotic germ cells. The transcripts considered specific in each cell type replicated the enriched expression patterns of each cell type (data not shown).

Each of these expression profiles recapitulated previously described and expected biological processes occurring in each cell type and at specific time frames in testicular development. Some of these processes are evident, as shown in Table 4, which relates previously known genes with specificity to certain cell types. In particular, Leydig cell-specific transcripts exhibited a number of genes involved in steroidogenesis and DNA condensation and sperm-structure-related genes were found in the meiotic and postmeiotic germ cell (pachytene spermatocytes and round spermatids)-specific transcript groupings. Complete lists of transcripts of enriched and specific transcripts will be available as supplemental data through the Griswold Lab homepage (<http://www.wsu.edu/~griswold/microarray>).

## DISCUSSION

During the development of the testis and the associated process of spermatogenesis, well-ordered and sequential changes in gene expression are required in order to create a fully functional testis capable of producing mature spermatozoa. Previous work using knockout or transgenic models, analyzing the functional impact of a single gene, have shown that, when the time frame or sequence of gene expression is altered, fertility issues can arise [65, 66]. This is a time-consuming and labor-intensive approach and ultimately impractical for analysis of a group of genes as large as those in a complete mammalian genome. An alternate approach is to look at changes in gene expression at a global level in a wild-type organism, studying an entire organ and its different cell types undergoing a normal process of differentiation and growth rather than the sum of its parts. This has been done on numerous occasions by investigators examining gene expression changes under certain conditions or in specific cell types in vitro [7, 67, 68]. These studies, although informative and insightful, are limited in their abilities to describe the transcriptional changes occurring in an entire organ under in vivo conditions.

Recently, studies have been undertaken to better understand changes in gene expression during spermatogenesis using various knockout models in combination with genome-scale analysis. Maratou et al. utilized cDNA microarrays with wild-type and *dazl* knockout mouse testes to examine the effects that *dazl* has on spermatogenesis [69]. However, this study focused on ~1300 unique genes obtained from a testis cDNA library, limiting the scope of their analysis. Similarly, O'Shaughnessy and colleagues utilized serial analysis of gene expression (SAGE) to characterize gene expression in somatic cells of the testis by using  $W^V/W^V$  mutant testis samples [70]. These studies did not examine the majority of the genes expressed in the testis but do provide useful datasets to complement genome-wide, wild-type testis datasets, such as the one in the current study.

The approach utilized in this study provides the opportunity to examine thousands of candidate genes based on their expression profile in the context of a time course of wild-type testis development. The appearance of distinct germ cell types was used as reference points for the construction of the time course, thus allowing spermatogenesis,

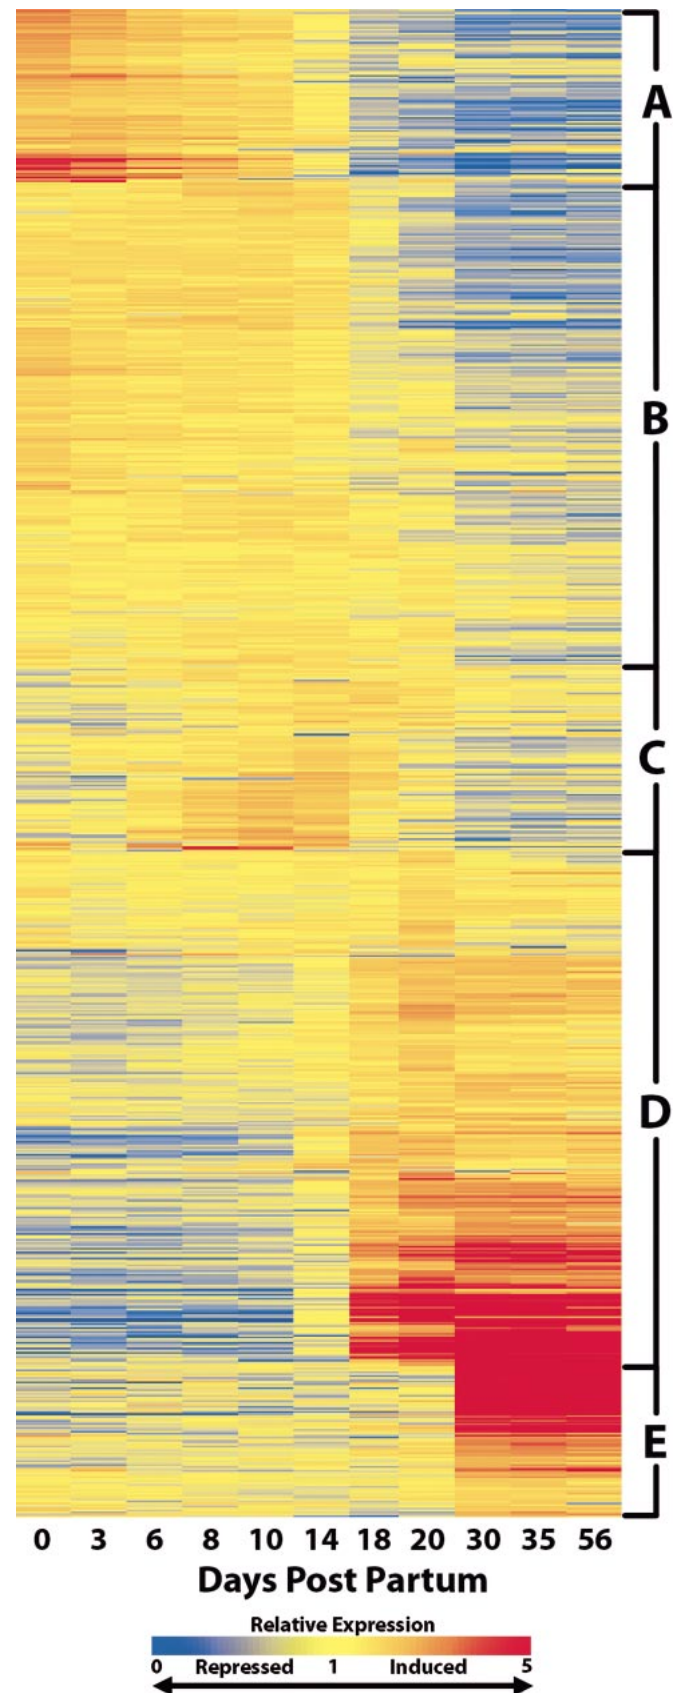

FIG. 2. Clustering of transcripts expressed at a statistically significant level during testis development. The gene tree shows the predominant patterns of gene expression of 9846 significantly expressed transcripts during spermatogenesis. Clustering was done within GeneSpring 5.1 using a smooth correlation with the default separation ratio and minimum distance. Letters A-E indicate distinct patterns of expression identified through clustering.



TABLE 2. Transcripts required for spermatogenesis as determined through knockout models.\*

| Description                                                 | GenBank no. | Cluster | Reference |
|-------------------------------------------------------------|-------------|---------|-----------|
| <i>Inhibin alpha</i>                                        | X55957      | A       | [13]      |
| <i>GDP dissociation inhibitor 1</i>                         | U07950      | A       | [14]      |
| <i>Insulin-like growth factor 1</i>                         | X04480      | A       | [15]      |
| <i>Jun proto-oncogene related gene dl</i>                   | J04509      | A       | [16]      |
| <i>Kit ligand</i>                                           | M57647      | B       | [17]      |
| <i>Bcl2-associated X</i>                                    | L22472      | B       | [18]      |
| <i>Mitochondrial insertional mutation</i>                   | AI183160    | B       | [19]      |
| <i>Desert hedgehog</i>                                      | AI666359    | B       | [20]      |
| <i>Solute carrier family 12, member 2</i>                   | U13174      | B       | [21]      |
| <i>Claudin 11</i>                                           | U19582      | C       | [22]      |
|                                                             | Y00864      | C       | [23]      |
| <i>Kit receptor</i>                                         | U43678      | C       | [24]      |
| <i>Ataxia telangiectasia mutated homolog</i>                | U41568      | C       | [25]      |
| <i>Dax1</i>                                                 |             |         | [26]      |
| <i>Double-sex and mab-3 related transcription factor 1</i>  | AL133300    | C       |           |
| <i>Cyclin A1</i>                                            | X84311      | D       | [27]      |
| <i>Heat shock protein 70-2</i>                              | L27086      | D       | [28]      |
| <i>TATA box binding protein-like 1</i>                      | AB017697    | D       | [29]      |
| <i>Calmegin</i>                                             | U08373      | D       | [30]      |
| <i>A disintegrin and metalloprotease domain 2</i>           |             |         | [31]      |
|                                                             | U16242      | D       |           |
| <i>MutS homolog 4</i>                                       | AV277719    | D       | [32]      |
| <i>Transition protein 1</i>                                 | X12521      | E       | [33]      |
| <i>Transition protein 2</i>                                 | M60254      | E       | [34]      |
| <i>Protamine 1</i>                                          | X07625      | E       | [35]      |
|                                                             | AA492653    | E       | [36]      |
| <i>Seven in absentia 1a</i>                                 | U69543      | E       | [37]      |
| <i>Hormone-sensitive lipase</i>                             |             |         | [38]      |
| <i>Phosphoserine/threonine/tyrosine interaction protein</i> | U34973      | E       |           |
| <i>Testicular haploid expressed gene</i>                    | AJ011834    | E       | [39]      |

\* Requirement for spermatogenesis based on knockout models listed by Matzuk and Lamb [40].

the process in which germ cells multiply and differentiate into mature spermatozoa, to act as a guide to critically analyze the time course.

The time course allows for queries concerning the testicular expression of the majority of genes of the murine genome. However, limitations on the interpretation of the results of these queries should be acknowledged. It has been reported that the Affymetrix GeneChips may yield up to 2% false positives, although transcripts are detected consistently and accurately at or above a 4-pM concentration [71]. These studies also measure only steady-state mRNA levels and may not reflect protein levels. As such, induction or repression of a transcript may not relate directly to functional changes. Additionally, in the developmental time course, the dynamic changes in expression levels for a particular transcript may be affected dramatically by changing cell populations. For example, transcripts in Sertoli cells appear to decrease at a slow but steady rate after the initiation of meiosis, but this is likely due in part to the relatively large increase in germ cell messages during the latter period in the initial wave of spermatogenesis. As a re-

sult, the induction or repression of transcripts expressed in specific testicular cell types may not entirely be the result of direct upregulation or downregulation and may in fact be the indirect result of changes in the cell composition of the testis. Figures 3 and 4, which illustrate the cell-specific expression profiles of testicular cell types during testis development, therefore may also be indicative of regulation due in part to changes in cell populations, particularly during the meiotic and postmeiotic periods of development.

Cultured Sertoli and myoid cells and isolated germ cell samples were used to identify enriched and specific transcripts in this study. The removal of Sertoli cells from their normal in vivo environment has been shown to alter the expression of various genes by disrupting the normal signaling that occurs between Sertoli cells and germ cells [72–74] and between different germ cell populations [75], and it can be inferred that the isolation of myoid cells using a culture system would have similar effects. Plotting these transcripts using the data associated with the developmental time course provides the ability to identify transcripts altered by the in vitro conditions and thus compensate for the isolation procedures performed on these cells. We have attempted to minimize this problem further by employing duplicate arrays and using relatively high signal values as a cutoff for analysis.

Evaluation of the time course in regard to reliability and accuracy of the data is essential in order to make full use of the dataset and support any findings that result from its analysis. Therefore, genes previously studied in the testis were examined in order to gauge the relative accuracy of the data. This was accomplished through literature searches for genes expressed prominently in the testis and in the individual testicular cell types. The time course appears to reproduce the expected expression profiles of known testis

TABLE 3. Enriched and specific transcripts in each testicular cell type as determined through in silico subtraction.

| Testicular cell type | Enriched | Specific | Percentage with significant change |
|----------------------|----------|----------|------------------------------------|
| Leydig               | 126      | 26       | 45                                 |
| Peritubular myoid    | 437      | 85       | 53                                 |
| Sertoli              | 152      | 30       | 59                                 |
| Type A spermatogonia | 50       | 4        | 62                                 |
| Type B spermatogonia |          |          |                                    |
| Pachytene            | 39       | 9        | 33                                 |
| Spermatocytes        | 364      | 34       | 72                                 |
| Round spermatids     | 694      | 215      | 87                                 |

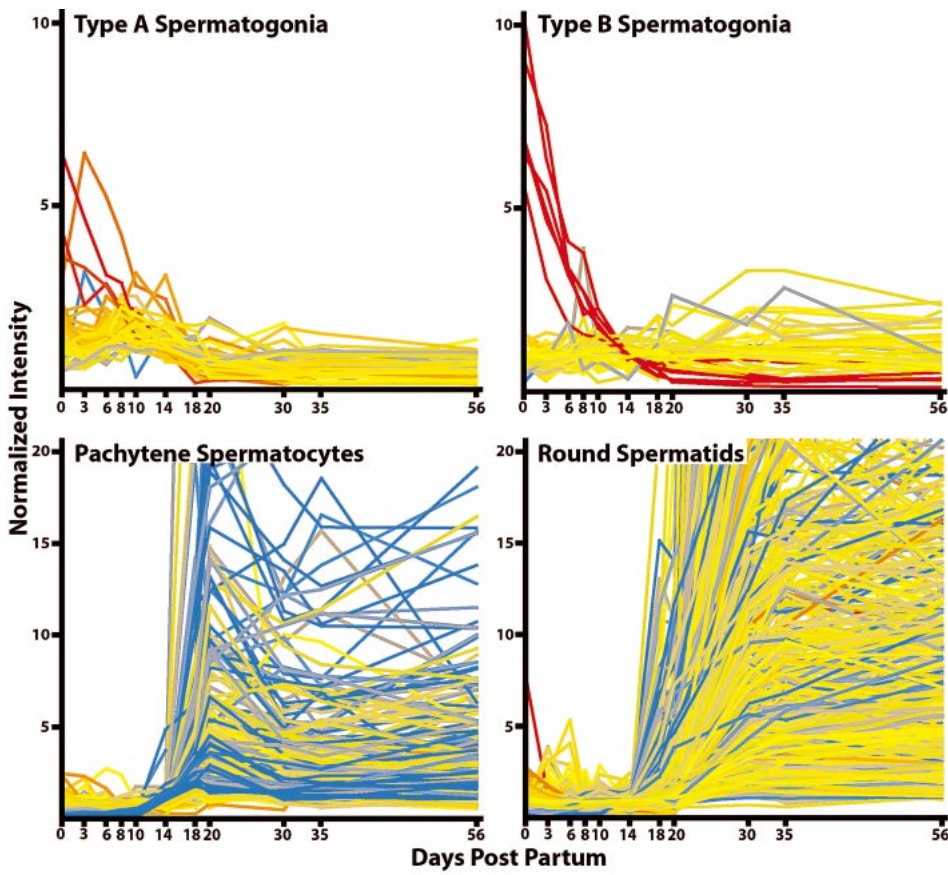

FIG. 3. Parallel-coordinate plot of germ cell-enriched transcripts generated using GeneSpring 5.1. Transcripts were isolated using in silico subtraction techniques based on each cell type and replotted using the developmental time course data. Colors are representative of expression levels at Day 0 postpartum. X-axis is days postpartum and the y-axis is normalized intensity.

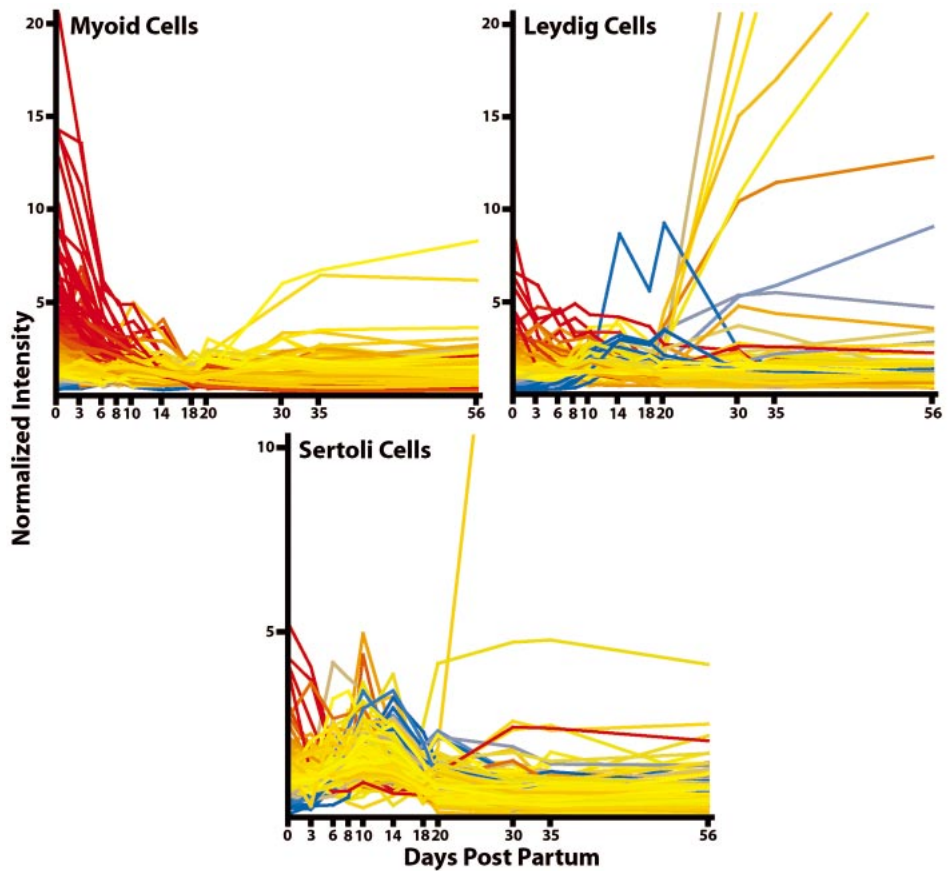

FIG. 4. Parallel-coordinate plot of somatic cell-enriched transcripts generated using GeneSpring 5.1. Transcripts were isolated using in silico subtraction techniques based on each cell type and replotted using the developmental time course data. Colors are representative of expression levels at Day 0 postpartum. X-axis is days postpartum and the y-axis is normalized intensity.

TABLE 4. Previously characterized testis cell-specific transcripts found in enriched and specific subtraction lists.

| Common name                                      | GenBank no. | Function                 | Reference |
|--------------------------------------------------|-------------|--------------------------|-----------|
| <b>Leydig</b>                                    |             |                          |           |
| <i>3<math>\beta</math>-HSD (type I)</i>          | M58567      | Steroid biosynthesis     | [41]      |
| <i>17<math>\beta</math>-HSD (type III)*</i>      | U66827      | Steroid biosynthesis     | [42]      |
| <i>Cyp17</i>                                     | M64863      | Steroid biosynthesis     | [43]      |
| <i>Vcam1</i>                                     | M84487      | Cell adhesion            | [44]      |
| <b>Sertoli</b>                                   |             |                          |           |
| <i>Gata1</i>                                     | X15763      | Transcription factor     | [45]      |
| <i>Clusterin</i>                                 | D14077      | Secretory protein        | [46]      |
| <i>Sox9*</i>                                     | A1060869    | Transcription factor     | [47]      |
| <i>Claudin 11</i>                                | U19582      | Tight junction structure | [48]      |
| <i>Cathepsin L</i>                               | X06086      | Protease                 | [49]      |
| <b>Myoid</b>                                     |             |                          |           |
| <i>Actin-<math>\alpha</math>2, smooth muscle</i> | X13297      | Cytoskeletal component   | [50]      |
| <i>Calcyclin</i>                                 | X66449      | Cell cycle regulator     | [51]      |
| <i>Collagen 4-<math>\alpha</math>1</i>           | M15832      | ECM structure            | [52]      |
| <i>Collagen 4-<math>\alpha</math>2</i>           | X04647      | ECM structure            | [52]      |
| <b>Premeiotic germ cells</b>                     |             |                          |           |
| <i>Dazl</i>                                      | U46694      | Developmental regulator  | [53]      |
| <i>c-Jun*</i>                                    | X12761      | Transcription factor     | [54]      |
| <i>Tex20*</i>                                    | AA16823 2   | Unknown                  | [55]      |
| <b>Meiotic and Postmeiotic germ cells</b>        |             |                          |           |
| <i>Pgk-2</i>                                     | M17299      | Glycolytic enzyme        | [56]      |
| <i>Ldhc</i>                                      | M17587      | Glycolytic enzyme        | [57]      |
| <i>Prm1*</i>                                     | X07625      | Sperm DNA structure      | [58]      |
| <i>Tenr</i>                                      | X84693      | RNA binding              | [59]      |
| <i>Zpbp38*</i>                                   | D17569      | Zona pellucida binding   | [60]      |
| <i>Gapds*</i>                                    | U09964      | Glycolytic enzyme        | [61]      |
| <i>Tp2*</i>                                      | M60254      | Sperm DNA structure      | [62]      |
| <i>CatSper1</i>                                  | A1037647    | Cation channel           | [63]      |

\* Indicates enriched genes also found to be specific.

genes as determined through examination of the results of cluster analysis. Genes known to be required for or highly expressed during meiosis, such as *cyclin A1* [27] and *heat shock protein 70-2* [28], as well as genes known to be associated with the postmeiotic germ cells, including *protamine 1* [35] and *transition protein 1* [33] and 2 [34], were found to be highly expressed at appropriate periods in the time course, and their induction coincides with the expected biological actions occurring within the testis. Genes normally expressed in the somatic cells of the testis, including *kit ligand* [76] and *clusterin* in Sertoli cells [46], *3 $\beta$ -hydroxysteroid dehydrogenase* in Leydig cells [41], and *calcyclin* in myoid cells [51] also reaffirms the dataset and our ability to accurately identify genes with functional significance in the testis. The vast majority of genes examined fit the expected profile within the time course both in induction and repression of expression and in peak signal levels.

The methods used to isolate cell-enriched and -specific transcripts were evaluated to determine the efficacy in isolating said transcripts. Genes expressed in specific cell types of the testis are shown in Table 4 and demonstrate the ability to identify genes associated with certain cell types using the devised in silico subtraction method. The results also suggest that previously uncharacterized transcripts found in these lists may also in fact be enriched or even specific in the respective cell types in the testis. However, the methods used to isolate these transcripts were relatively stringent and, as a result many transcripts thought to be specific in a particular cell type and supported by experimental evidence failed to pass the restrictions applied to isolate these groups of transcripts. This indicates that, while useful, the in silico subtraction process employed to isolate these transcripts is not without flaws. A possible

alternative approach for isolating cell-specific transcripts would be to use statistical analysis rather than fold-change cutoffs to identify transcripts based on significant differences in expression level between cell populations rather than an arbitrary fold-change difference.

The overall pattern of gene expression during the period of testicular development examined in this study demonstrated three key features: 1) ~50% of the murine genome (based on the Affymetrix microarray platform) may be involved in testis development and/or spermatogenesis at any point between birth and adulthood, 2) ~30% of the murine genome is differentially expressed in a significant manner during testis development, and 3) major periods of expressional change occur during the first few days after birth (0–6 days postpartum), at the initiation of meiosis (~14 days postpartum), and with the appearance of haploid gametes (~20 days postpartum). Limitations of this microarray platform are evident and include incomplete coverage of the murine genome (only 6000 well-characterized genes are represented on the array set) and incorrectly represented genes due to inaccurate probe sets, and this may play a role in the number of transcripts contributing in testis function. The percentage of the murine genome shown to be involved in the testis is nonetheless indicative of the highly specialized role it plays in sperm production. A recent publication using a similar time course and the same microarray platform found that 21 274 (or ~58%) of the murine genome was expressed during testis development in the mouse [64]. This corroborates our finding that a large portion of the murine genome is possibly involved in testis formation and function and spermatogenesis. Considering the unique functional nature of Sertoli, peritubular myoid, and Leydig cells as well as the specialized requirements associated with



meiosis, spermatogenesis, and the eventual fertilization requirements of sperm, the amount of the genome dedicated to and regulated in the testis seems reasonable and probable.

The ultimate goal of any study utilizing microarrays to examine gene expression on a genome-wide scale in a complex tissue is to link the patterns of gene expression to the functional significance and cellular composition of the tissue of interest. Examination of wild-type gene expression in the testis provides great insight into the overall expression changes necessary to elicit spermatogenesis and the production of spermatozoa; however, determining the specific actions and the functional significance of these changes in expression and relating that to the specific testicular cell types is far more difficult. The goal of this study is an attempt at profiling the transcriptome of each cell type and relating that to the overall patterns of expression occurring in the testis. Examination of the timing of gene expression in each cell type based on overall expression patterns presented unique insights into the functional activities of each cell type during specific periods of testis development.

Expression of enriched transcripts in Sertoli cells is primarily focused at 10 days postpartum, with very few transcripts showing elevated expression in the postmeiotic stages of spermatogenesis and only slightly more expressed at an elevated level perinatally. Many of these transcripts are expressed similarly to the transcripts found in Figure 2, B and C. Nearly 45% of the enriched transcripts for Sertoli cells match these expression profiles, indicating that a large portion of Sertoli cell-specific transcripts are differentially expressed around the time of meiosis between the initiation of meiosis at 10 days postpartum and the appearance of pachytene spermatocytes at 14 days postpartum. Little to no Sertoli cell-specific gene expression was observed early or late in testis development. The similarity of the transcripts expressed in an exclusive fashion in Sertoli cells to those in the two patterns elucidated through cluster analysis suggests that many of the Sertoli cell-enriched and -specific transcripts are involved in the adaptation of these cells to accommodate the newly forming meiotic and postmeiotic germ cells. The presence of *claudin 11*, which has previously been found to be Sertoli cell specific, further emphasizes this possibility, considering its necessity for the completion of spermatogenesis and resultant fertility [22].

Type A and B spermatogonia demonstrated a similar expression profile to that of Sertoli cells, although slight differences were evident. Both types of spermatogonia had a large percentage of enriched transcripts overlap with the transcripts identified in clusters A and B (46%), indicating a greater period of expressional activity earlier in development. Surprisingly, very little spermatogonia-specific expression was detected after meiosis had begun. The lack of differential expression in spermatogonia during and after meiosis does not necessarily indicate that there are no changes occurring, but rather that these changes are based on the expression of genes that are not unique to spermatogonia. The high level of overlap between spermatogonial enriched genes and the pattern of expression in cluster B (elevated expression from birth to ~10 days postpartum) suggests that many unique spermatogonial genes are downregulated as germ cells enter meiosis. A specific transcript demonstrating a unique expression profile indicative of localization to spermatogonia was *dlk1* (*delta-like homolog 1*), a gene for which the activity and localization in the testis was previously unreported but has been implicated in inhibition of adipocyte differentiation [77] and car-

diomyocyte differentiation [78] and is highly expressed in neuroblastoma cell lines [79]. *Dlk1* was highly expressed in Type A and B spermatogonia with nearly total loss of expression by 20 days postpartum and the appearance of haploid germ cells. Its localization to type B spermatogonia through in silico subtraction indicates its possible involvement in the differentiation of spermatogonia and its rapid decrease in expression beginning at the onset of meiosis furthers the possibility that it may be involved in the differentiation that occurs that allows spermatogonia to progress in spermatogenesis and eventually enter meiosis. A variant form of *dlk1*, *fetal antigen-1 (FA1)*, was previously localized to Leydig cells but lacks the membrane-bound C-terminal region as well as the signal peptide, indicating that the *dlk1* transcript possibly has multiple functions in the testis in alternatively spliced forms [80].

Expression early in testis development was predominated by myoid cell-enriched transcripts. Nearly 50% of all myoid-enriched transcripts demonstrated a similar expression profile to that in clusters A and B, signifying a large role in testis development associated with the early postnatal stages of growth. Interestingly, myoid cells exhibited the greatest number of enriched and specific transcripts of the somatic testicular cell types examined by a wide margin. The high number of transcripts expressed exclusively in myoid cells indicates that their role in testis function and the seminiferous tubule environment may be greater than originally thought. Many of these transcripts are associated with the extracellular matrix and basal lamina of a cell, including numerous collagens and proteoglycans. These include *collagen 4 alpha 1* and 2, which have previously been shown to be specifically expressed in myoid cells [52]. The expression of numerous genes related to the extracellular matrix and basal lamina is indicative of the large role that myoid cells play in establishing the gross morphological structure of the seminiferous tubules. Recently, however, publications have shown that proper myoid cell structure and function is required for both proper testis formation [81] and for the progression of spermatogenesis [82]. Therefore, many of the transcripts localized to myoid cells may in fact be necessary for more than just the establishment of connective tissue structures between the cells of the testis.

Although no purified populations of Leydig cells were available for this study, Leydig cell gene expression was simulated using the W/W<sup>v</sup> testis expression profile as a starting point and subtracting the expression profiles of myoid and Sertoli cells and spermatogonia. Thus, the results should be predominated by transcripts expressed in Leydig cells. This was confirmed to some degree by the presence of genes encoding two of the required sex steroid enzymes necessary for the conversion of cholesterol to androgens including, *3β-hydroxysteroid dehydrogenase (3β-HSD)* and *17β-hydroxysteroid dehydrogenase (17β-HSD)*. In addition, *vascular cell adhesion molecule 1 (VCAM1)*, a known Leydig cell-specific gene [44], was also found in the enriched group of transcripts obtained through in silico subtraction. This would tend to support our technique to simulate Leydig cell gene expression using the W/W<sup>v</sup> testis and in silico subtractions. The overall expression profile of Leydig cells did not fit any profile achieved through clustering nor did it follow any similar pattern of other testicular cell types. However, a small number of transcripts did demonstrate a similar expression pattern to transcripts found in cluster A. These transcripts could be involved in early Leydig cell differentiation, from fetal to adult, which

occurs by 7 days postpartum in the mouse [83]. Many of these transcripts could be involved in this differentiation process and the conversion of luteinizing hormone-independent cells to dependent cells.

The most significant changes in expression throughout the time course were observed after the initiation of meiosis and the subsequent appearance of spermatocytes and spermatids. As expected, the pachytene spermatocyte and round spermatid expression profiles were also >70% similar to clusters D and E, respectively. This is demonstrated by the expression profiles of pachytene spermatocytes and round spermatids in Figure 3, in which numerous transcripts exhibit a high degree of induction beginning at 14 days postpartum. This is also highly similar to the expression profiles observed through clustering in clusters D and E, where the majority of transcripts are induced by 18 and 30 days postpartum, respectively. The spermatocyte- and spermatid-enriched transcript groups were also significantly larger than all the other testicular cell types. This is largely due to the relatively large number of unique genes required to initiate and maintain meiotic activity and produce functional sperm. These include genes involved in sperm structure, DNA reorganization and condensation, unique metabolism genes, and an assortment of genes involved in sperm-egg binding, motility, and other processes and structures occurring nowhere else in mammalian biology. One of the more intriguing aspects of the analysis of these transcripts was the discovery that many spermatid-enriched or -specific transcripts began being expressed at 14 days postpartum, the period in which spermatocytes, but not necessarily spermatids, are prominent in the testis. This is shown in Figure 3D, which portrays the round spermatid-enriched transcript expression during testis development. Within this group are transcripts encoding zona-pellucida binding proteins, testis-specific serine proteases, and sperm tail structure proteins as well as a large number of EST sequences derived from testis cDNA libraries. Many of these genes would seemingly need to be expressed and subsequently translated toward the end of spermatogenesis but are instead expressed nearly 20 days before the appearance of mature spermatozoa. This observation implies that many of the morphological and biochemical characteristics of spermatozoa are initiated with expression of specific genes during meiosis rather than after the completion of meiotic divisions.

The testis developmental gene expression time course is a step forward in deciphering the regulation of gene expression necessary to elicit testis formation and spermatogenesis. As previously stated, this approach generated data on testis developmental gene expression activity at an exceptional level and, as a result, will allow further inquiries into specific aspects of testis development ultimately controlled by transcriptional events and regulation. Although the general patterns of expression are useful in looking at the testis as an entire tissue, the use of this time course in combination with more specific approaches to studying testis function and other available datasets may in fact be the most vital method of completely describing the testis at the molecular level. Approaches such as knockout and transgenic models and the establishment and characterization of cell lines to further characterize the functional significance of these changes in gene expression are additional avenues of scientific exploration that can be based on the data within this time course and lead to a better understanding of the functioning of the testis at all levels of inquiry.

## ACKNOWLEDGMENTS

The authors would like to thank Derek Pouchnik in the Laboratory for Bioanalysis and Biotechnology I (LBBI) at Washington State University, Pullman, WA, for microarray hybridization and scanning. Thanks also go to Alice Karl and Debra Mitchell for assistance with the mouse colony and Sertoli and myoid cell cultures and Chris Small for critical reading of the manuscript.

## REFERENCES

- Eddy EM. Male germ cell gene expression. *Recent Prog Horm Res* 2002; 57:103–128.
- McCarrey JR. Development of the germ cell. In: Claude Desjardins LLE (ed.), *Cell and Molecular Biology of the Testis*. New York: Oxford University Press; 1993:58–89.
- Nebel BR, Amarose AP, Hackett EM. Calendar of gametogenic development in the prepubertal male mouse. *Science* 1961; 134:832–833.
- Schena M, Shalon D, Heller R, Chai A, Brown PO, Davis RW. Parallel human genome analysis: microarray-based expression monitoring of 1000 genes. *Proc Natl Acad Sci U S A* 1996; 93:10614–10619.
- DeRisi J, Penland L, Brown PO, Bittner ML, Meltzer PS, Ray M, Chen Y, Su YA, Trent JM. Use of a cDNA microarray to analyse gene expression patterns in human cancer. *Nat Genet* 1996; 14:457–460.
- Lockhart DJ, Dong H, Byrne MC, Follettie MT, Gallo MV, Chee MS, Mittmann M, Wang C, Kobayashi M, Horton H, Brown EL. Expression monitoring by hybridization to high-density oligonucleotide arrays. *Nat Biotechnol* 1996; 14:1675–1680.
- McLean DJ, Friel PJ, Pouchnik D, Griswold MD. Oligonucleotide microarray analysis of gene expression in follicle-stimulating hormone-treated rat Sertoli cells. *Mol Endocrinol* 2002; 16:2780–2792.
- Andrews J, Bouffard GG, Cheadle C, Lu J, Becker KG, Oliver B. Gene discovery using computational and microarray analysis of transcription in the *Drosophila melanogaster* testis. *Genome Res* 2000; 10:2030–2043.
- Reinke V, Smith HE, Nance J, Wang J, Van Doren C, Begley R, Jones SJ, Davis EB, Scherer S, Ward S, Kim SK. A global profile of germline gene expression in *C. elegans*. *Mol Cell* 2000; 6:605–616.
- Karl AF, Griswold MD. Sertoli cells of the testis: preparation of cell cultures and effects of retinoids. *Methods Enzymol* 1990; 190:71–75.
- Bellve AR. Purification, culture, and fractionation of spermatogenic cells. *Methods Enzymol* 1993; 225:84–113.
- Eisen MB, Spellman PT, Brown PO, Botstein D. Cluster analysis and display of genome-wide expression patterns. *Proc Natl Acad Sci U S A* 1998; 95:14863–14868.
- Matzuk MM, Finegold MJ, Su JG, Hsueh AJ, Bradley A. Alpha-inhibin is a tumour-suppressor gene with gonadal specificity in mice. *Nature* 1992; 360:313–319.
- Togawa A, Miyoshi J, Ishizaki H, Tanaka M, Takakura A, Nishioka H, Yoshida H, Doi T, Mizoguchi A, Matsuura N, Niho Y, Nishimune Y, Nishikawa S, Takai Y. Progressive impairment of kidneys and reproductive organs in mice lacking Rho GDIalpha. *Oncogene* 1999; 18:5373–5380.
- Baker J, Hardy MP, Zhou J, Bondy C, Lupu F, Bellve AR, Efstratiadis A. Effects of an Igf1 gene null mutation on mouse reproduction. *Mol Endocrinol* 1996; 10:903–918.
- Thepot D, Weitzman JB, Barra J, Segretain D, Stinnakre MG, Babinet C, Yaniv M. Targeted disruption of the murine junD gene results in multiple defects in male reproductive function. *Development* 2000; 127:143–153.
- Matsui Y, Zsebo KM, Hogan BL. Embryonic expression of a haematopoietic growth factor encoded by the Sl locus and the ligand for c-kit. *Nature* 1990; 347:667–669.
- Knudson CM, Tung KS, Tourtellotte WG, Brown GA, Korsmeyer SJ. Bax-deficient mice with lymphoid hyperplasia and male germ cell death. *Science* 1995; 270:96–99.
- Watson ML, Zinn AR, Inoue N, Hess KD, Cobb J, Handel MA, Halaban R, Duchene CC, Albright GM, Moreadith RW. Identification of morc (microorchidia), a mutation that results in arrest of spermatogenesis at an early meiotic stage in the mouse. *Proc Natl Acad Sci U S A* 1998; 95:14361–14366.
- Bitgood MJ, Shen L, McMahon AP. Sertoli cell signaling by Desert hedgehog regulates the male germline. *Curr Biol* 1996; 6:298–304.
- Pace AJ, Lee E, Athirakul K, Coffman TM, O'Brien DA, Koller BH. Failure of spermatogenesis in mouse lines deficient in the Na(+)-K(+)-2Cl(-) cotransporter. *J Clin Invest* 2000; 105:441–450.
- Gow A, Southwood CM, Li JS, Pariali M, Riordan GP, Brodie SE,

- Danias J, Bronstein JM, Kachar B, Lazzarini RA. CNS myelin and Sertoli cell tight junction strands are absent in *Osp/claudin-11* null mice. *Cell* 1999; 99:649–659.
23. Manova K, Nocka K, Besmer P, Bachvarova RF. Gonadal expression of *c-kit* encoded at the *W* locus of the mouse. *Development* 1990; 110:1057–1069.
  24. Xu Y, Ashley T, Brainerd EE, Bronson RT, Meyn MS, Baltimore D. Targeted disruption of *ATM* leads to growth retardation, chromosomal fragmentation during meiosis, immune defects, and thymic lymphoma. *Genes Dev* 1996; 10:2411–2422.
  25. Yu RN, Ito M, Saunders TL, Camper SA, Jameson JL. Role of *Ahch* in gonadal development and gametogenesis. *Nat Genet* 1998; 20:353–357.
  26. Raymond CS, Murphy MW, O'Sullivan MG, Bardwell VJ, Zarkower D. *Dmrt1*, a gene related to worm and fly sexual regulators, is required for mammalian testis differentiation. *Genes Dev* 2000; 14:2587–2595.
  27. Liu D, Matzuk MM, Sung WK, Guo Q, Wang P, Wolgemuth DJ. *Cyclin A1* is required for meiosis in the male mouse. *Nat Genet* 1998; 20:377–380.
  28. Dix DJ, Allen JW, Collins BW, Mori C, Nakamura N, Poorman-Allen P, Goulding EH, Eddy EM. Targeted gene disruption of *Hsp70-2* results in failed meiosis, germ cell apoptosis, and male infertility. *Proc Natl Acad Sci U S A* 1996; 93:3264–3268.
  29. Zhang D, Penttila TL, Morris PL, Teichmann M, Roeder RG. Spermiogenesis deficiency in mice lacking the *Trf2* gene. *Science* 2001; 292:1153–1155.
  30. Ikawa M, Wada I, Kominami K, Watanabe D, Toshimori K, Nishimune Y, Okabe M. The putative chaperone *calmegin* is required for sperm fertility. *Nature* 1997; 387:607–611.
  31. Cho C, Bunch DO, Faure JE, Goulding EH, Eddy EM, Primakoff P, Myles DG. Fertilization defects in sperm from mice lacking *fertilin beta*. *Science* 1998; 281:1857–1859.
  32. Kneitz B, Cohen PE, Avdievich E, Zhu L, Kane MF, Hou H Jr, Kolodner RD, Kucherlapati R, Pollard JW, Edelmann W. *MutS* homolog 4 localization to meiotic chromosomes is required for chromosome pairing during meiosis in male and female mice. *Genes Dev* 2000; 14:1085–1097.
  33. Yu YE, Zhang Y, Unni E, Shirley CR, Deng JM, Russell LD, Weil MM, Behringer RR, Meistrich ML. Abnormal spermatogenesis and reduced fertility in transition nuclear protein 1-deficient mice. *Proc Natl Acad Sci U S A* 2000; 97:4683–4688.
  34. Zhao M, Shirley CR, Yu YE, Mohapatra B, Zhang Y, Unni E, Deng JM, Arango NA, Terry NH, Weil MM, Russell LD, Behringer RR, Meistrich ML. Targeted disruption of the transition protein 2 gene affects sperm chromatin structure and reduces fertility in mice. *Mol Cell Biol* 2001; 21:7243–7255.
  35. Cho C, Willis WD, Goulding EH, Jung-Ha H, Choi YC, Hecht NB, Eddy EM. Haploinsufficiency of *protamine-1* or *-2* causes infertility in mice. *Nat Genet* 2001; 28:82–86.
  36. Dickins RA, Frew IJ, House CM, O'Bryan MK, Holloway AJ, Haviv I, Traficante N, de Kretser DM, Bowtell DD. The ubiquitin ligase component *Siah1a* is required for completion of meiosis I in male mice. *Mol Cell Biol* 2002; 22:2294–2303.
  37. Osuga J, Ishibashi S, Oka T, Yagyu H, Tozawa R, Fujimoto A, Shionoiri F, Yahagi N, Kraemer FB, Tsutsumi O, Yamada N. Targeted disruption of hormone-sensitive lipase results in male sterility and adipocyte hypertrophy, but not in obesity. *Proc Natl Acad Sci U S A* 2000; 97:787–792.
  38. Wishart MJ, Dixon JE. The archetype *STYX/dead-phosphatase* complexes with a spermatid mRNA-binding protein and is essential for normal sperm production. *Proc Natl Acad Sci U S A* 2002; 99:2112–2117.
  39. Yanaka N, Kobayashi K, Wakimoto K, Yamada E, Imahie H, Imai Y, Mori C. Insertional mutation of the murine *kisimo* locus caused a defect in spermatogenesis. *J Biol Chem* 2000; 275:14791–14794.
  40. Matzuk MM, Lamb DJ. Genetic dissection of mammalian fertility pathways. *Nat Cell Biol* 2002; 4(S1):S41–S49.
  41. Baker PJ, Sha JA, McBride MW, Peng L, Payne AH, O'Shaughnessy PJ. Expression of  $\beta$ -hydroxysteroid dehydrogenase type I and type VI isoforms in the mouse testis during development. *Eur J Biochem* 1999; 260:911–917.
  42. O'Shaughnessy PJ, Baker PJ, Heikkila M, Vainio S, McMahon AP. Localization of  $17\beta$ -hydroxysteroid dehydrogenase/ $17\alpha$ -ketosteroid reductase isoform expression in the developing mouse testis—*androstenedione* is the major androgen secreted by fetal/neonatal Leydig cells. *Endocrinology* 2000; 141:2631–2637.
  43. Le Goascogne C, Sananes N, Guezou M, Takemori S, Kominami S, Baulieu EE, Robel P. Immunoreactive cytochrome P-450(17 $\alpha$ ) in rat and guinea-pig gonads, adrenal glands and brain. *J Reprod Fertil* 1991; 93:609–622.
  44. Sainio-Pollanen S, Sundstrom J, Erkkila S, Hanninen A, Vainiopaa M, Martikainen M, Salminen E, Verajankorva E, Antola H, Nikula H, Simell O, Pollanen P. *CD106* (VCAM-1) in testicular immunoregulation. *J Reprod Immunol* 1997; 33:221–238.
  45. Yomogida K, Ohtani H, Harigae H, Ito E, Nishimune Y, Engel JD, Yamamoto M. Developmental stage- and spermatogenic cycle-specific expression of transcription factor *GATA-1* in mouse Sertoli cells. *Development* 1994; 120:1759–1766.
  46. Griswold MD, Roberts K, Bishop P. Purification and characterization of a sulfated glycoprotein secreted by Sertoli cells. *Biochemistry* 1986; 25:7265–7270.
  47. Kent J, Wheatley SC, Andrews JE, Sinclair AH, Koopman P. A male-specific role for *SOX9* in vertebrate sex determination. *Development* 1996; 122:2813–2822.
  48. Morita K, Sasaki H, Fujimoto K, Furuse M, Tsukita S. *Claudin-11/OSP*-based tight junctions of myelin sheaths in brain and Sertoli cells in testis. *J Cell Biol* 1999; 145:579–588.
  49. Erickson-Lawrence M, Zabudoff SD, Wright WW. Cyclic protein-2, a secretory product of rat Sertoli cells, is the proenzyme form of cathepsin L. *Mol Endocrinol* 1991; 5:1789–1798.
  50. Tung PS, Fritz IB. Characterization of rat testicular peritubular myoid cells in culture:  $\alpha$ -smooth muscle isoactin is a specific differentiation marker. *Biol Reprod* 1990; 42:351–365.
  51. Konrad L, Aumuller G. Calyculin is differentially expressed in rat testicular cells. *Biochim Biophys Acta* 1999; 1489:440–444.
  52. Pollanen PP, Kallajoki M, Risteli L, Risteli J, Suominen JJ. Laminin and type IV collagen in the human testis. *Int J Androl* 1985; 8:337–347.
  53. Niederberger C, Agulnik AI, Cho Y, Lamb D, Bishop CE. In situ hybridization shows that *Dazl* expression in mouse testis is restricted to premeiotic stages IV–VI of spermatogenesis. *Mamm Genome* 1997; 8:277–278.
  54. Alcivar AA, Hake LE, Hardy MP, Hecht NB. Increased levels of *junB* and *c-jun* mRNAs in male germ cells following testicular cell dissociation. Maximal stimulation in prepubertal animals. *J Biol Chem* 1990; 265:20160–20165.
  55. Wang PJ, McCarrey JR, Yang F, Page DC. An abundance of X-linked genes expressed in spermatogonia. *Nat Genet* 2001; 27:422–426.
  56. Robinson MO, McCarrey JR, Simon MI. Transcriptional regulatory regions of testis-specific *PGK2* defined in transgenic mice. *Proc Natl Acad Sci U S A* 1989; 86:8437–8441.
  57. Blanco A. On the functional significance of *LDH X*. *Johns Hopkins Med J* 1980; 146:231–235.
  58. Hecht NB, Bower PA, Kleene KC, Distel RJ. Size changes of *protamine 1* mRNA provide a molecular marker to monitor spermatogenesis in wild-type and mutant mice. *Differentiation* 1985; 29:189–193.
  59. Schumacher JM, Lee K, Edelhoff S, Braun RE. Distribution of *Tenr*, an RNA-binding protein, in a lattice-like network within the spermatid nucleus in the mouse. *Biol Reprod* 1995; 52:1274–1283.
  60. Mori E, Baba T, Iwamatsu A, Mori T. Purification and characterization of a 38-kDa protein, *sp38*, with zona pellucida-binding property from porcine epididymal sperm. *Biochem Biophys Res Commun* 1993; 196:196–202.
  61. Welch JE, Schatte EC, O'Brien DA, Eddy EM. Expression of a glyceraldehyde 3-phosphate dehydrogenase gene specific to mouse spermatogenic cells. *Biol Reprod* 1992; 46:869–878.
  62. Kleene KC, Flynn JF. Characterization of a cDNA clone encoding a basic protein, *TP2*, involved in chromatin condensation during spermiogenesis in the mouse. *J Biol Chem* 1987; 262:17272–17277.
  63. Ren D, Navarro B, Perez G, Jackson AC, Hsu S, Shi Q, Tilly JL, Clapham DE. A sperm ion channel required for sperm motility and male fertility. *Nature* 2001; 413:603–609.
  64. Schultz N, Hamra FK, Garbers DL. A multitude of genes expressed solely in meiotic or postmeiotic spermatogenic cells offers a myriad of contraceptive targets. *Proc Natl Acad Sci U S A* 2003; 100:12201–12206.
  65. Giorgini F, Davies HG, Braun RE. Translational repression by *MSY4* inhibits spermatid differentiation in mice. *Development* 2002; 129:3669–3679.
  66. Li X, Nakkala E, Yan W, Steng T, Saarinen N, Warri A, Huhtaniemi I, Santti R, Makela S, Poutanen M. Altered structure and function of reproductive organs in transgenic male mice overexpressing human aromatase. *Endocrinology* 2001; 142:2435–2442.
  67. Ohta S, Fuse H, Tabuchi Y. DNA microarray analysis of genes in-



- volved in the process of differentiation in mouse Leydig cell line TTE1. *Arch Androl* 2002; 48:203–208.
68. Ostermeier GC, Dix DJ, Miller D, Khatri P, Krawetz SA. Spermatozoal RNA profiles of normal fertile men. *Lancet* 2002; 360:772–777.
  69. Maratou K, Forster T, Costa Y, Taggart M, Speed RM, Ireland J, Teague P, Roy D, Cooke HJ. Expression profiling of the developing testis in wild-type and *Dazl* knockout mice. *Mol Reprod Dev* 2004; 67:26–54.
  70. O'Shaughnessy PJ, Fleming L, Baker PJ, Jackson G, Johnston H. Identification of developmentally regulated genes in the somatic cells of the mouse testis using serial analysis of gene expression. *Biol Reprod* 2003; 69:797–808.
  71. Rajagopalan D. A comparison of statistical methods for analysis of high density oligonucleotide array data. *Bioinformatics* 2003; 19:1469–1476.
  72. Vidal F, Lopez P, Lopez-Fernandez LA, Ranc F, Scimeca JC, Cuzin F, Rassoulzadegan M. Gene trap analysis of germ cell signaling to Sertoli cells: NGF-TrkA mediated induction of *Fra1* and *Fos* by post-meiotic germ cells. *J Cell Sci* 2001; 114:435–443.
  73. Syed V, Hecht NB. Up-regulation and down-regulation of genes expressed in cocultures of rat Sertoli cells and germ cells. *Mol Reprod Dev* 1997; 47:380–389.
  74. Jegou B. Spermatis are regulators of Sertoli cell function. *Ann N Y Acad Sci* 1991; 637:340–353.
  75. Zhao GQ, Deng K, Labosky PA, Liaw L, Hogan BL. The gene encoding bone morphogenetic protein 8B is required for the initiation and maintenance of spermatogenesis in the mouse. *Genes Dev* 1996; 10:1657–1669.
  76. Rossi P, Albanesi C, Grimaldi P, Geremia R. Expression of the mRNA for the ligand of c-kit in mouse Sertoli cells. *Biochem Biophys Res Commun* 1991; 176:910–914.
  77. Moon YS, Smas CM, Lee K, Villena JA, Kim KH, Yun EJ, Sul HS. Mice lacking paternally expressed *Pref-1/Dlk1* display growth retardation and accelerated adiposity. *Mol Cell Biol* 2002; 22:5585–5592.
  78. Anisimov SV, Tarasov KV, Riordon D, Wobus AM, Boheler KR. SAGE identification of differentiation responsive genes in P19 embryonic cells induced to form cardiomyocytes in vitro. *Mech Dev* 2002; 117:25–74.
  79. van Limpt V, Chan A, Caron H, Sluis PV, Boon K, Hermus MC, Versteeg R. SAGE analysis of neuroblastoma reveals a high expression of the human homologue of the *Drosophila* *Delta* gene. *Med Pediatr Oncol* 2000; 35:554–558.
  80. Jensen CH, Erb K, Westergaard LG, Kliem A, Teisner B. Fetal antigen 1, an EGF multidomain protein in the sex hormone-producing cells of the gonads and the microenvironment of germ cells. *Mol Hum Reprod* 1999; 5:908–913.
  81. Meeks JJ, Crawford SE, Russell TA, Morohashi K, Weiss J, Jameson JL. *Dax1* regulates testis cord organization during gonadal differentiation. *Development* 2003; 130:1029–1036.
  82. Clark AM, Garland KK, Russell LD. Desert hedgehog (*Dhh*) gene is required in the mouse testis for formation of adult-type Leydig cells and normal development of peritubular cells and seminiferous tubules. *Biol Reprod* 2000; 63:1825–1838.
  83. Vergouwen RP, Jacobs SG, Huiskamp R, Davids JA, de Rooij DG. Proliferative activity of gonocytes, Sertoli cells and interstitial cells during testicular development in mice. *J Reprod Fertil* 1991; 93:233–243.
